# Supplementary material for: Optimised Agrobacterium-Mediated Transformation and Application of Developmental Regulators Improve Regeneration Efficiency in Melons
Source: MDPI journal article supplement (doi:10.3390/genes14071432), 2023-07-12
Supplement: s1 [file s1]

# Supplementary Information

## Optimised *Agrobacterium*-mediated Transformation and Application of Developmental Regulators Improve Regeneration Efficiency in Melons

Lili Wan <sup>1+</sup>, Zhuanrong Wang <sup>1+</sup>, Xuejun Zhang <sup>2,3</sup>, Hongxia Zeng <sup>1</sup>, Jian Ren <sup>1</sup>, Na Zhang <sup>1</sup>, Yuhong Sun <sup>1</sup> and Tang Mi <sup>1\*</sup>

cgacactctgctactccaagaatatcaagatacagctcagaagaccaaagggtattgagactttcaacaaagggtaatatcgggaaacctctcggtattccatt  
gcccagctatctgtcacttcatcaaaaggacagtagaaaaaggaaggtggcacctacaaatgccatcattgcgataaaggaaaggctatcgttcaagatgcctctgccg  
acagtgggtccaaagatggacccccacccacgaggagcatcgtggaaaaagaagacgttccaaccacgtcttcaagcaagtggtgatgtgaacatggtggagc  
acgacactctcgtctactccaagaatatcaagatacagctcagaagaccaaagggtattgagactttcaacaaagggtaatatcgggaaacctctcggtattccat  
tgcccagctatctgtcacttcatcaaaaggacagtagaaaaaggaaggtggcacctacaaatgccatcattgcgataaaggaaaggctatcgttcaagatgcctctgccg  
acagtgggtccaaagatggacccccacccacgaggagcatcgtggaaaaagaagacgttccaaccacgtcttcaagcaagtggtgatgtgatatctccactgac  
gtaagggtgacgcacaatccactatctctgcaagaccttctctatataaggaaagttcatttcatttggagaggacacgtgaaatcaccagtctctctacaaatc  
tatctctcaaacattactcattcacaacacatctaaagcaactacacaaagttgaaattttctcatttttactatataaacctttaatacaaatcaagataactATG  
ACAACCTTCAAAATCGAGTCCCGGATCCACGGCAACCTCAACGGGGAGAAGTTCGAGTTGGTTGGAG  
GTGGAGTAGGTGAGGAGGGTGCCTCGAGATTGAGATGAAGACTAAAGATAAACCCTGGCATTCTC  
TCCCTTCCTGCTGACCACTTGCATGGGTTACGGGTTCTACCACTTCGCCAGCTTCCCAAAGGGGATTA  
AGAACATCTATCTTCATGCTGCAACGAACGGAGGTTACACCAACACCAGGAAGGAGATCTATGAAGA  
CGGCGGCATCTTGGAGGTCAACTTCCGTTACACTTACGAGTTCAACAAGATCATCGGTGACGTCGAGT  
GCATTGGACATGGATTCCCAAGTCAGAGTCCGATCTTCAAGGACACGATCGTGAAGAGTTGTCCACG  
GTGGACCTGATGTTGCCAATGTCCGGGAACATCATCGCCAGCTCCTACGCTTACGCCTTCCAACCTGAA  
GGACGGCTCTTTCTACACGGCAGAAGTCAAGAACAACATAGACTTCAAGAATCCAATCCACGAGTCC  
TTCTCGAAGTCAGGGCCCATGTTACCCACAGACGTGTGAGGAGACTCTCACCAAGGAGAACCTTG  
CCATAGTGGAGTACCAGCAGGTTTTCAACAGCGCCCCAAGAGACATGTAGatataagatgaagatgaaatatttggtg  
tgcaataaaaaagctgtgtgcttaagttgtgtttttcttggtgtgtgtatgaatttggtgcttttctaatataaatgaatgtaagatctcattataatgaataacaaat  
gtttctataatccattgtgaatgtttgttgatctctctgcagcatataactactgtatgtctatggtatggactatggaatatgattaaagataagatgggtcatagagta  
aaacgaggcgaggacataaaacctccctcatcatgctatttcatgatctatttataaaataaagatgtagaaaaagtaagcgtataaaccgcaaaacaaatgattta  
aaacatggcacataatgaggagattaaagttcgggttacgtttatttagtactaattgtaacgtgagactacgtatcgggaatcgcctaataaagcattaatgcgaacctga  
ttagattcaccgacctctatcgtgtcagctttctgtttctagaatttttggtagctctgtactaataatgtcagcttcgtattttcataagcaatttgcaattgt  
ttttactttttttattgtattgtggaatgtggactcgtaccaacatgaagttatataccacaaaaaaatacagttagtcaaaagattcacgagtgaagctacttattgatt  
gtcttttacgtatgtctaatgtctattgtctcaataatcttgtactttctttgtcgttgataaaatcacaagttccaaaagtaatcgaatgatttgcctttaagaaaagaaga  
gtcaataatcaacataatctgtacaca

Supplemental Figure S1. CpYGFP\_eYGFPuv expression cassette in the binary vector PV16

Black indicates the CaMV35S promoter, blue indicates the 5'-UTR, red indicates CpYGFP\_eYGFPuv, green indicates the 3'-UTR of At5g59720, purple indicates the At5g59720 terminator.

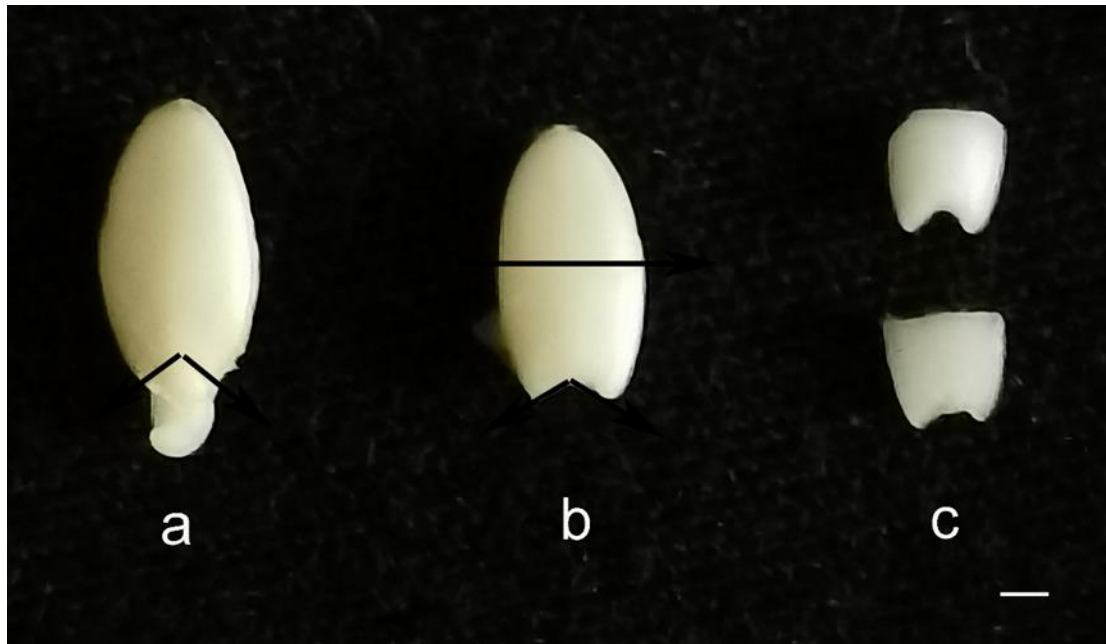

Supplemental Figure S2. Explant preparation

Excision of embryos from the germinated seeds (a). Cotyledons were cut in half transversely (b) and proximal parts with U-shaped ends were selected as explants (c). Bar = 0.5 cm

Table S1. Primers used in this study

| Primer name                                                             | Sequence (5'–3')                                                       |                  |
|-------------------------------------------------------------------------|------------------------------------------------------------------------|------------------|
| PA <sub>t</sub> GRF5-F                                                  | TTACATTTACAATTACCATGGATGATGAGTCTAAGTGGAA                               |                  |
| PA <sub>t</sub> GRF5-R                                                  | CTCTAGACTCACCTAGGATCCTTAGCTACCAGTGTGAGT                                |                  |
| PA <sub>t</sub> PLT5-F                                                  | TTACATTTACAATTACCATGGATGAAGAACAATAACAACA                               |                  |
| PA <sub>t</sub> PLT5-R                                                  | CTCTAGACTCACCTAGGATCCTCATTCCAACCCAAAAACC                               |                  |
| PA <sub>t</sub> BBM-F                                                   | TTACATTTACAATTACCATGG ATGAACCTCGATGAATAACTG                            |                  |
| PA <sub>t</sub> BBM-R                                                   | CTCTAGACTCACCTAGGATCCCTAAGTGTCGTTCCAAACTG                              |                  |
| PA <sub>t</sub> WUS-F                                                   | TTACATTTACAATTACCATGGATGGAGCCGCCACAGCATC                               |                  |
| PA <sub>t</sub> WUS-R                                                   | CTCTAGACTCACCTAGGATCCCTAGTTCAGACGTAGCTCA                               |                  |
| PA <sub>t</sub> WOX5-F                                                  | TTACATTTACAATTACCATGGATGTCTTTCTCCGTGAAAGG                              |                  |
| PA <sub>t</sub> WOX5-R                                                  | CTCTAGACTCACCTAGGATCCTTAAAGAAAGCTTAATCGA                               |                  |
| PA <sub>t</sub> WIND1-F                                                 | TTACATTTACAATTACCATGGATGGCAGCTGCTATGAATT                               |                  |
| PA <sub>t</sub> WIND1-R                                                 | CTCTAGACTCACCTAGGATCCCTAAGCTAGAATCGAATCC                               |                  |
| Primers for the construction of gRNA expression vectors targeting CmPDS |                                                                        |                  |
| T1CmPDS-319F:                                                           | GTATCCGGTCTCGATTGATAGTGAGATTGTGGGCGATGTT                               |                  |
| T1CmPDS-319F0:                                                          | TGATAGTGAGATTGTGGGCGATGTTTTAGAGCTAGAAATAGC                             |                  |
| T2CmPDS-320R0:                                                          | AACTAGACCACAGATAGATGATACAATCACTACTTCGTCTCTAA                           |                  |
| T2CmPDS-320R:                                                           | TAGATTGGTCTCGAAACTAGACCACAGATAGATGATACAA                               |                  |
| Primers for Hi-Tom                                                      |                                                                        |                  |
| CmPDS-F373                                                              | GGAGTGAGTACGGTGTGCGTTCTCCATTAAGTTGTGAG                                 | first-round PCR  |
| CmPDS-R373                                                              | GAGTTGGATGCTGGATGGACTAGCAGATAAGGAAGCTG                                 |                  |
| HT-In-20F                                                               | AATGATACGGCGACCACCGAGATCTACACCTTGACAGACACTC<br>TTTCCCTACACGACGCTCTTCCG | second-round PCR |
| HT-In-20R                                                               | CAAGCAGAAGACGGCATACGAGATACGTGATAGTGAAGTGGAGT<br>TCAGACGTGTGCTCTT       |                  |
| Primers for genotyping the transformed seedlings                        |                                                                        |                  |
| Bar-354F                                                                | GATTAGGCATCGAACCTTCA                                                   |                  |
| Bar-354R                                                                | CTATCCCTCGCTTCCTTCTC                                                   |                  |
| PB7-AtU6-26F                                                            | GATTAGGCATCGAACCTTCA                                                   |                  |
| PB7-AtU6-26R                                                            | CTATCCCTCGCTTCCTTCTC                                                   |                  |

Table S2 Mutation types determined by Hi-TOM

A01 #ZHF line1 Target 1 (Homozygous mutation)

| Sort | Read number | Ratio | Left variation type | Left variation | Right variation type | Right variation |
|------|-------------|-------|---------------------|----------------|----------------------|-----------------|
| 1    | 2315        | 95%   | 3D                  | TGG            | 3D                   | TGG             |

C02 #ZHF line 11 Target 1 (heterozygous mutation)

| Sort | Read number | Ratio | Left variation type | Left variation | Right variation type | Right variation |
|------|-------------|-------|---------------------|----------------|----------------------|-----------------|
| 1    | 1125        | 52%   | 6D                  | TGGGCG         | 6D                   | TGGGCG          |
| 2    | 1057        | 48%   | -                   | WT             | -                    | WT              |

D5 #Z12 line 3 Target 1 (Homozygous mutation)

| Sort | Read number | Ratio | Left variation type | Left variation | Right variation type | Right variation |
|------|-------------|-------|---------------------|----------------|----------------------|-----------------|
| 1    | 1891        | 96%   | 5D                  | GTGGG          | 5D                   | GTGGG           |

F2 #Z12 line 9 Target 1 (Heterozygous mutation)

| Sort | Read number | Ratio | Left variation type | Left variation | Right variation type | Right variation |
|------|-------------|-------|---------------------|----------------|----------------------|-----------------|
| 1    | 1563        | 54%   | 6D                  | GTGGGC         | 6D                   | GTGGGC          |
| 2    | 1338        | 46%   | -                   | WT             | -                    | WT              |

B05 #ZHF line4 Target 2 (Heterozygous mutation)

| Sort | Read number | Ratio | Left variation type | Left variation | Right variation type | Right variation |
|------|-------------|-------|---------------------|----------------|----------------------|-----------------|
| 1    | 1455        | 52%   | 1D<br>2I            | A<br>>GC       | 1D<br>2I             | A<br>>GC        |
| 2    | 1326        | 48%   | 3D                  | CAC            | 3D                   | CAC             |

C06 #Z12 line10 Target 2 (Heterozygous mutation)

| Sort | Read number | Ratio | Left variation type | Left variation | Right variation type | Right variation |
|------|-------------|-------|---------------------|----------------|----------------------|-----------------|
| 1    | 1231        | 55%   | 1D                  | A              | 1D                   | A               |
| 2    | 1018        | 45%   | 3D                  | CAC            | 3D                   | CAC             |

Table S3 Survival rate of the melon variety ZHF after Treatments A, B, C, and D

| Treatment A                | ZHF                       |                 |                 |
|----------------------------|---------------------------|-----------------|-----------------|
|                            | No. of surviving explants | No. of explants | survival rate % |
| Rep 1                      | 81                        | 90              | 90              |
| Rep 2                      | 83                        | 87              | 95              |
| Rep 3                      | 76                        | 89              | 85              |
| Average of survival rate % |                           |                 | 90 ± 5a         |
| Treatment B                | ZHF                       |                 |                 |
|                            | No. of surviving explants | No. of explants | survival rate % |
| Rep 1                      | 94                        | 110             | 85              |
| Rep 2                      | 85                        | 109             | 78              |
| Rep 3                      | 91                        | 101             | 90              |
| Average survival rate %    |                           |                 | 84 ± 6a         |
| Treatment C                | ZHF                       |                 |                 |
|                            | No. of surviving explants | No. of explants | survival rate % |
| Rep 1                      | 94                        | 110             | 85              |
| Rep 2                      | 80                        | 109             | 73              |
| Rep 3                      | 68                        | 98              | 69              |
| Average survival rate %    |                           |                 | 75 ± 8a         |
| Treatment D                | ZHF                       |                 |                 |
|                            | No. of surviving explants | No. of explants | survival rate % |
| Rep 1                      | 76                        | 110             | 69              |
| Rep 2                      | 63                        | 102             | 62              |
| Rep 3                      | 74                        | 105             | 70              |
| Average survival rate %    |                           |                 | 67 ± 4b         |

The number of explants is the sum of surviving explants after infection in three independent experiments. The average survival rate (%) represents the mean of three independent replicates. Different lowercase letters indicate significant differences ( $P < 0.1$ , Tukey's test). Treatment A: micro-brushing (Brush) + sonication (Son) (30 s); treatment B: Brush + Son (30 s) + vacuum (-0.3 kPa); treatment C: Brush + Son (30 s) + vacuum (-0.5 kPa); treatment D: Brush + Son (30 s) + vacuum (-1.0 kPa).

Table S4 Survival rate of melon variety Z12 after Treatments A, B, C, and D

| Treatment A             | Z12                       |                 |                 |
|-------------------------|---------------------------|-----------------|-----------------|
|                         | No. of surviving explants | No. of explants | survival rate % |
| Rep 1                   | 84                        | 88              | 95              |
| Rep 2                   | 95                        | 104             | 91              |
| Rep 3                   | 90                        | 98              | 92              |
| Average survival rate % |                           |                 | 93 ± 3a         |
| Treatment B             | Z12                       |                 |                 |
|                         | No. of surviving explants | No. of explants | survival rate % |
| Rep 1                   | 78                        | 87              | 90              |
| Rep 2                   | 81                        | 92              | 88              |
| Rep 3                   | 80                        | 95              | 84              |
| Average survival rate % |                           |                 | 87 ± 3a         |
| Treatment C             | Z12                       |                 |                 |
|                         | No. of surviving explants | No. of explants | survival rate % |
| Rep 1                   | 75                        | 99              | 76              |
| Rep 2                   | 78                        | 101             | 77              |
| Rep 3                   | 84                        | 112             | 75              |
| Average survival rate % |                           |                 | 76 ± 1b         |
| Treatment D             | Z12                       |                 |                 |
|                         | No. of surviving explants | No. of explants | survival rate % |
| Rep 1                   | 71                        | 109             | 65              |
| Rep 2                   | 71                        | 102             | 70              |
| Rep 3                   | 62                        | 103             | 60              |
| Average survival rate % |                           |                 | 65 ± 5c         |

The number of explants is the sum of the surviving explants after infection in three independent experiments. The average survival rate (%) represents the mean of three independent replicates. Different lowercase letters indicate significant differences ( $P < 0.1$ , Tukey's test). Treatment A: micro-brushing (Brush) + sonication (Son) (30 s); treatment B: Brush + Son (30 s) + vacuum (-0.3 kPa); treatment C: Brush + Son (30 s) + vacuum (-0.5 kPa); treatment D: Brush + Son (30 s) + vacuum (-1.0 kPa).

Supplemental File S1. Tissue culture medium

Germination medium: 4.4 g/L Murashige and Skoog (MS) medium (PhytoTech LABS, M519), 30 g/L sucrose, 0.5 g/L Phytigel (Sigma-Aldrich, P8169), pH 5.85.

Inoculation medium: 1 mg/L 6-benzylaminopurine (6BA), 1 mg/L abscisic acid (ABA), 200  $\mu$ M acetosyringone, and 1.25 mM morpholinoethanesulfonic acid were added to MS medium, 30 g/L sucrose, pH 5.40.

Co-cultivation medium: 0.5 mg/L 6BA, 1 mg/L ABA, 200  $\mu$ M AS, and 1.25 mM morpholinoethanesulfonic acid were added to MS medium, 30 g/L sucrose, pH 5.40.

Selection medium: 1 mg/L 6BA, 0.1 mg/L ABA, 1 mg/L  $\text{CuSO}_4 \cdot 5\text{H}_2\text{O}$ , 150 mg/L timentin, 250 mg/L cefotaxime, and 4 mg/L glufosinate-ammonium were added to MS medium, 30 g/L sucrose, pH 5.8.

Root induction medium: 1 mg/L indole-3-butyric acid, 150 mg/L timentin, and 250 mg/L cefotaxime were added to MS medium, 30 g/L sucrose, pH 5.8.

To prepare the liquid medium for *Agrobacterium* culture, the LB medium was supplemented with spectinomycin (50 mg/L) and rifampicin (25 mg/L). All tissue cultures were maintained in a culture room under a 16-h light/8-h dark cycle at 22°C to 25°C.
